# Supplementary material
Source: Springer Nature journal article supplement (https://www.springermedizin.de/resource/supplementary/12891_2010_1154_MOESM2_ESM.pdf/9507174)

Detection of improvement goals

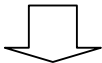

Analysis of current care, target group, setting

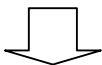

Selection of implementation strategies

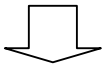

Testing and execution of implementation plan

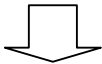

Evaluation and readjustment of implementation plan

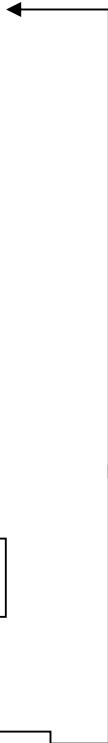

Supplement: MOESM2 [file 9507174]
